# Supplementary material
Source: PubMed Central journal article supplement (PMC3902092)

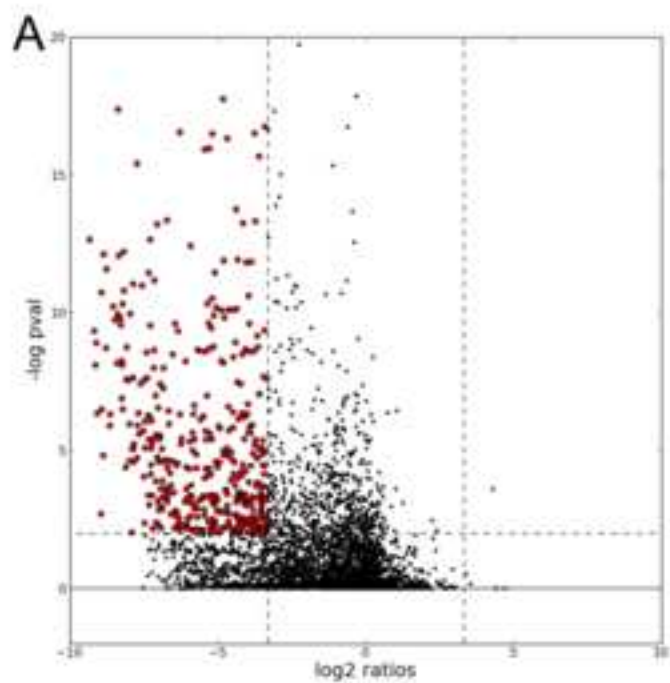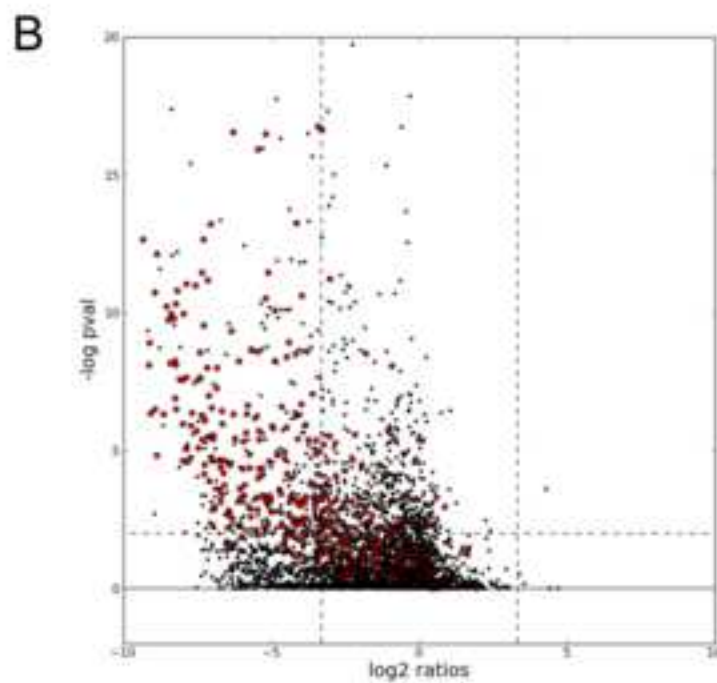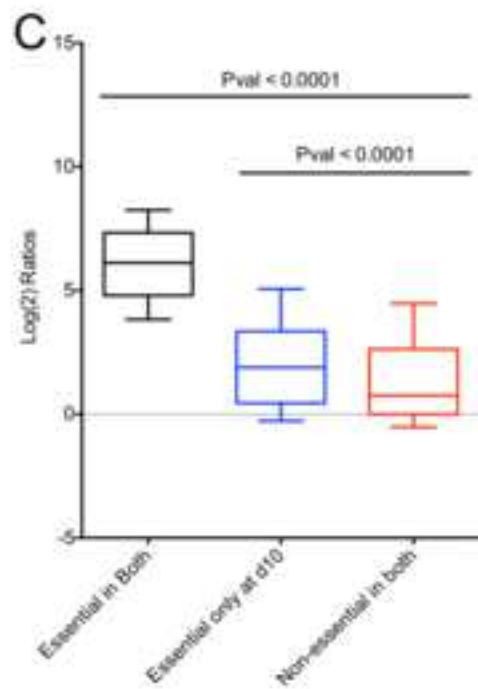

A

D10 P-value = 0.018

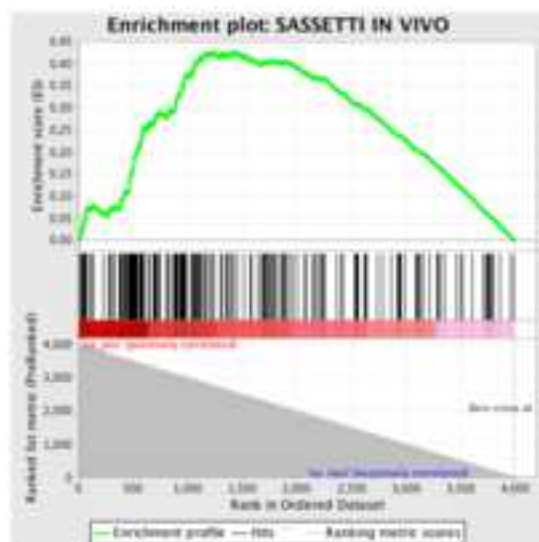

D45 P-value = 0.001

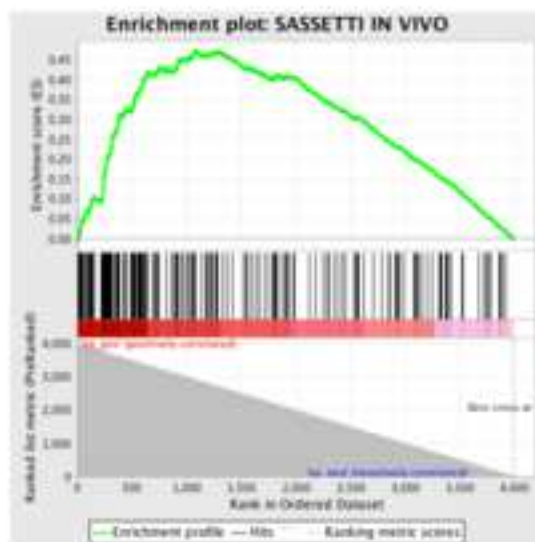

B

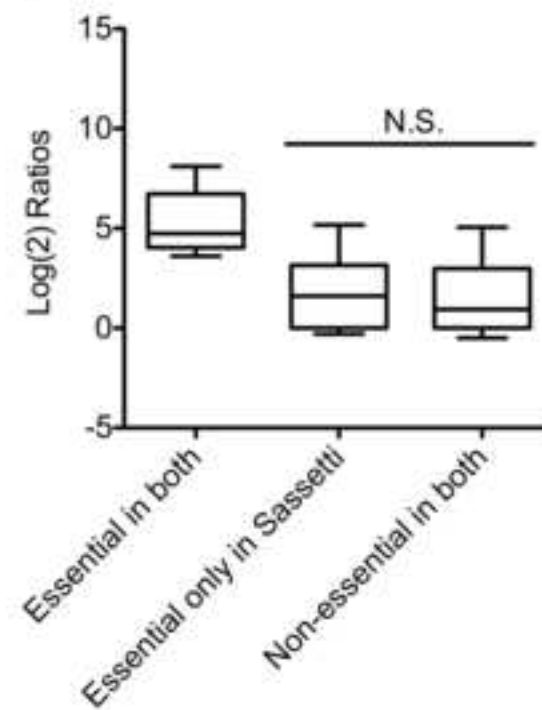

A

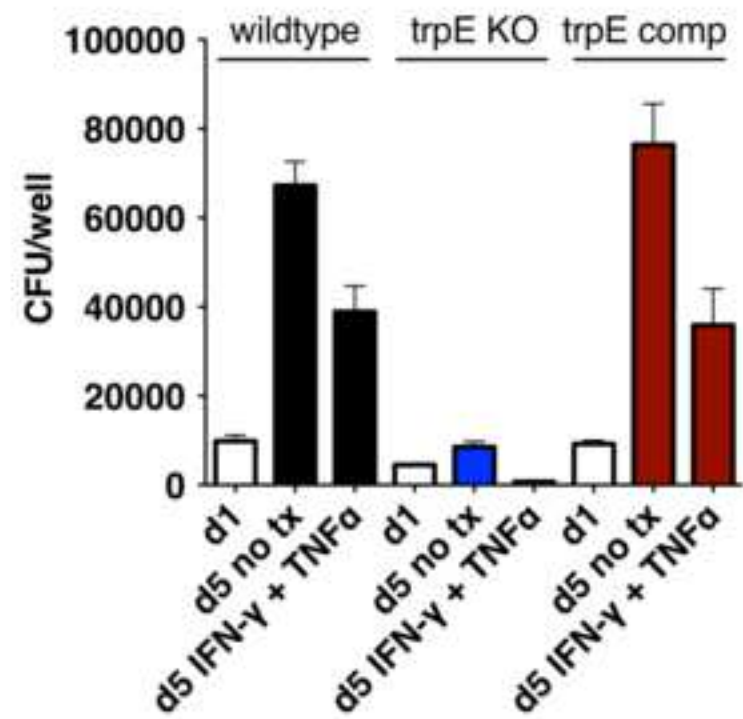

B

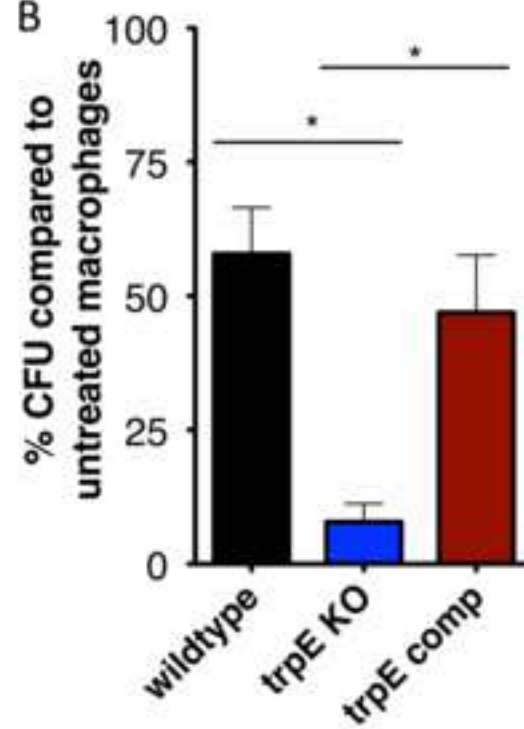

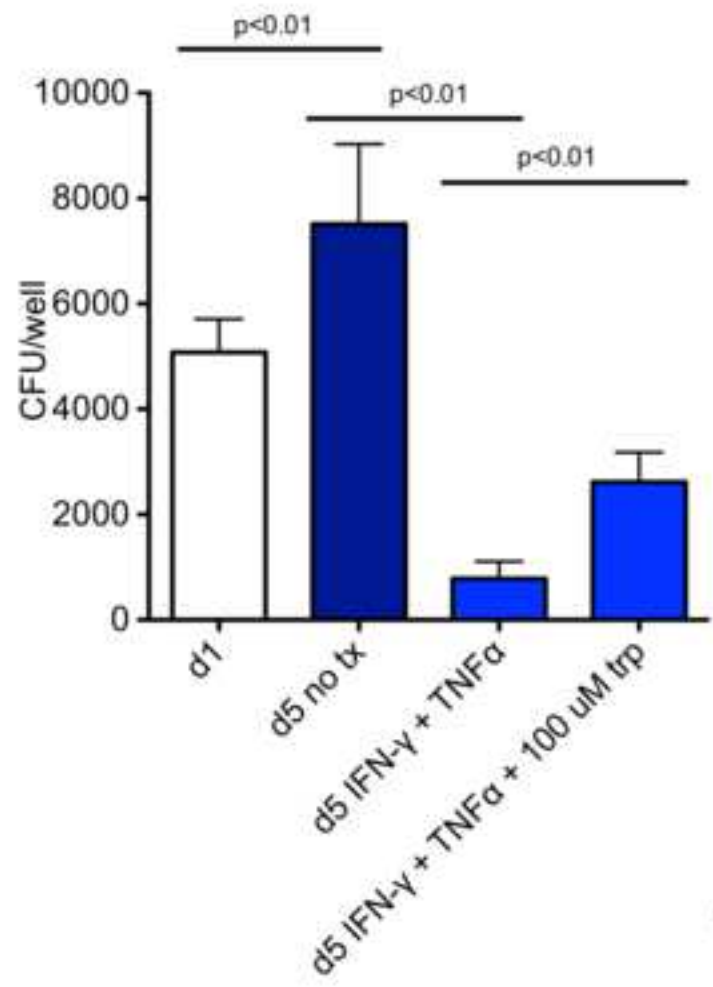

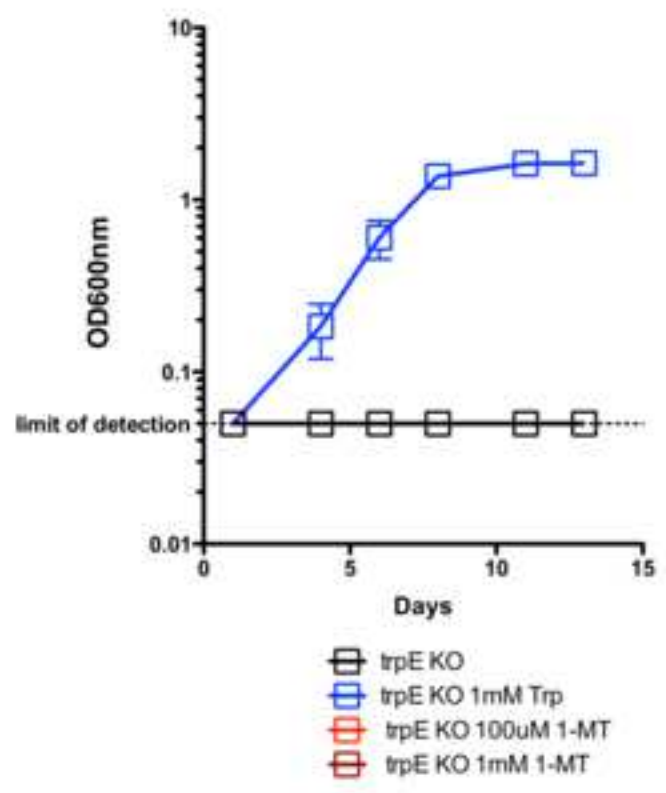

### *M. smegmatis* inhibition by FABA

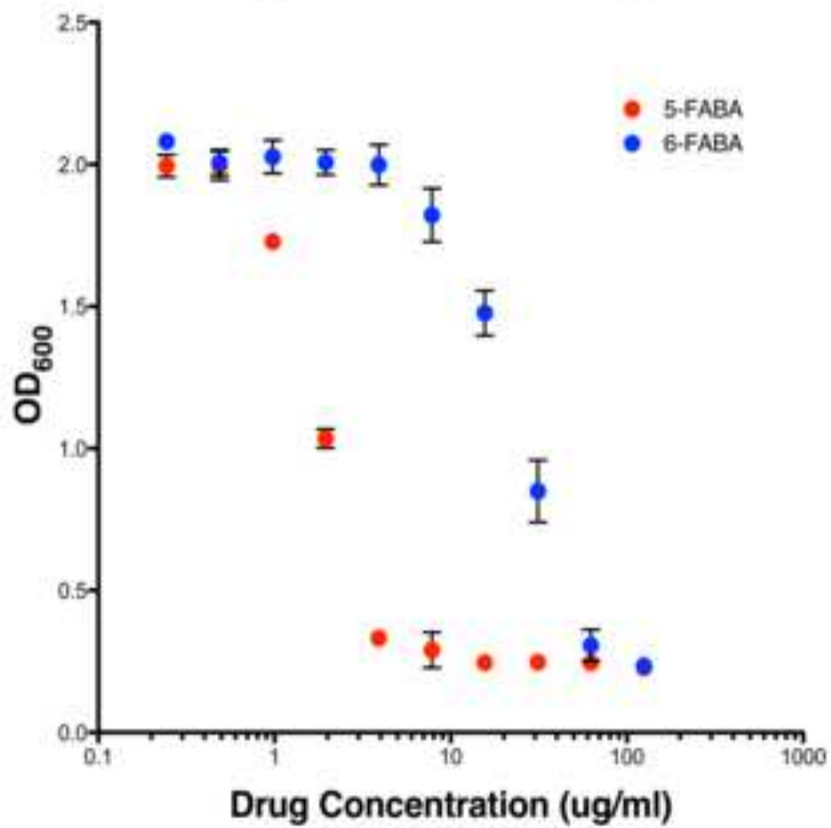

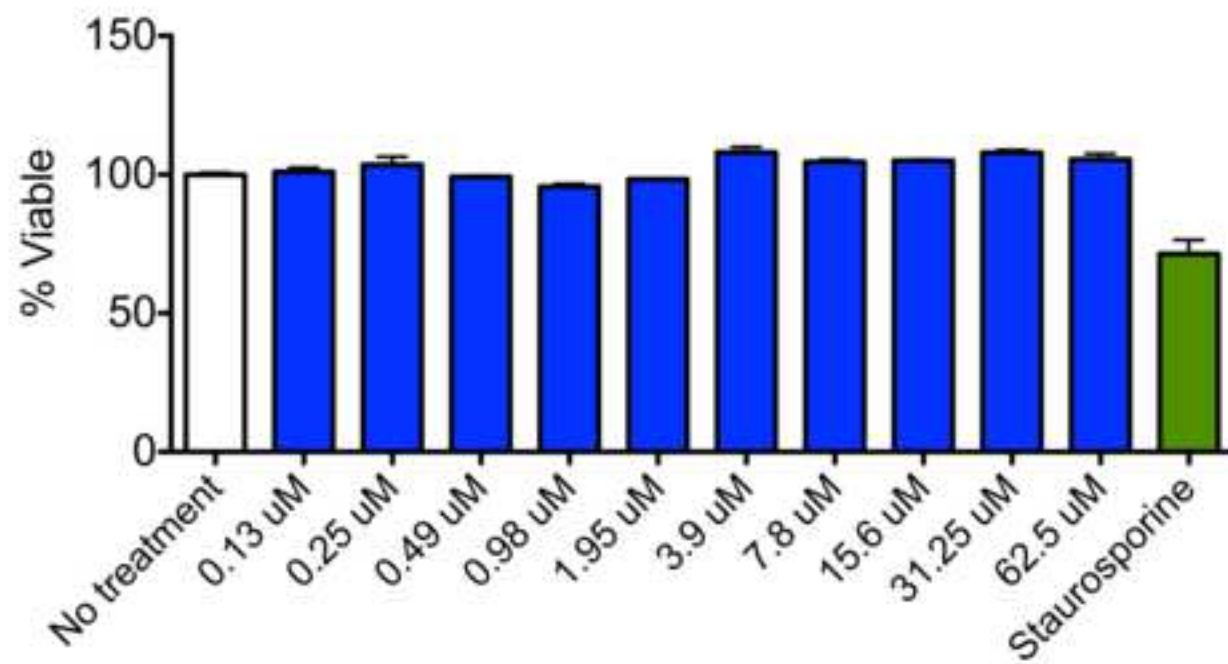

A

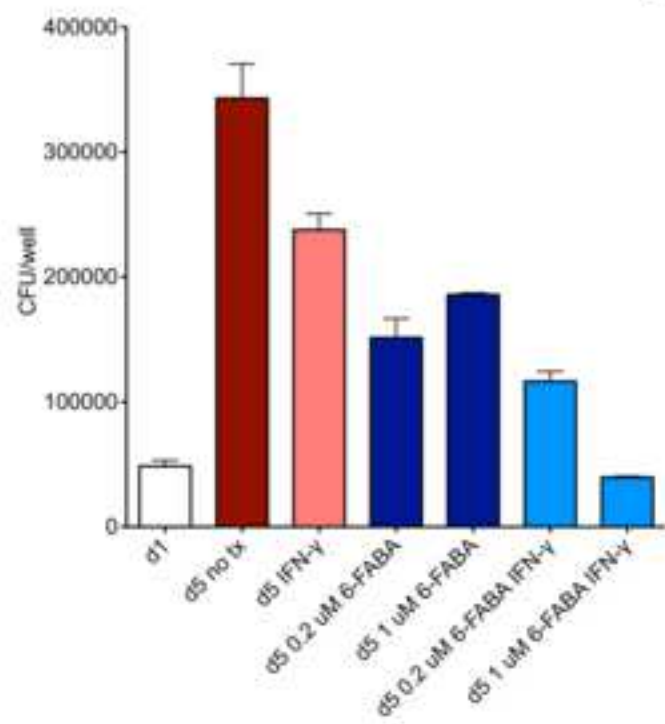

B

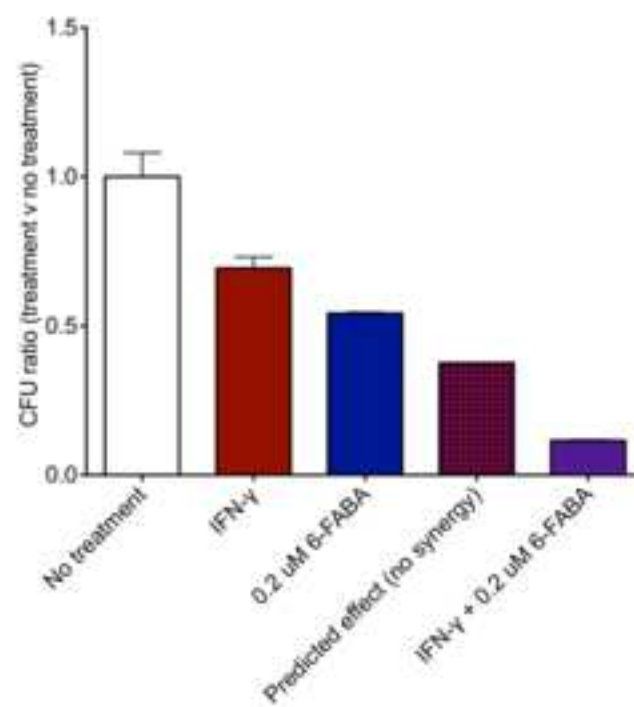



A

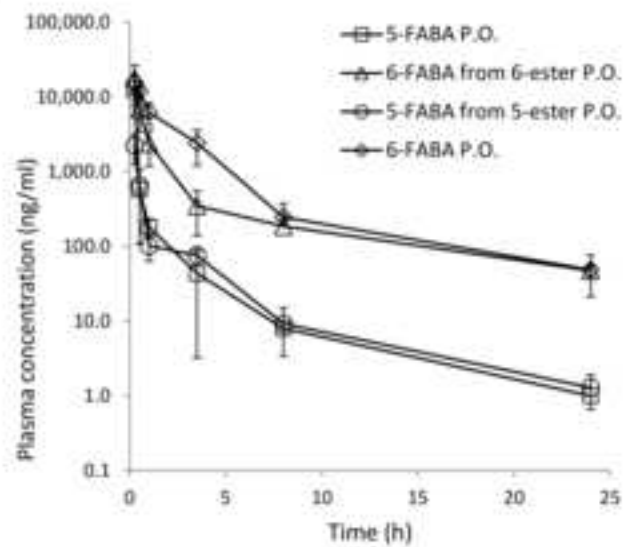

B

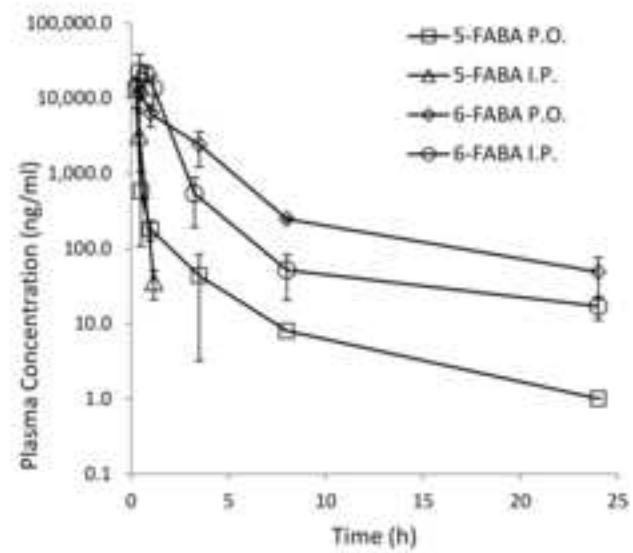

Supplement: NIHMS545069-supplement-01.pdf [file NIHMS545069-supplement-01.pdf]
